# Supplementary material for: Evaluation of Physical and Mental Health in Adults Who Underwent Limb-Lengthening Procedures with Circular External Fixators during Childhood or Adolescence
Source: Preprints.org preprint supplement (doi:10.20944/preprints202408.1449.v1), 2024-08-20
Supplement: Supplementary file 1 [file supplementary]

**SUPPLEMENTARY MATERIALS**

**Table S1.** Heterogeneity analysis among the groups of patients observed after the inclusion process. N = number; LLD = lower limb length discrepancy; Q1 = first quartile; Q3 = third quartile; LP = lengthening procedure; HI = healing index; TTT = total treatment time; PROMs = patient reported outcome measures; (*): adjusted residual > ±2.0.

|  | **N** | **Median (Q1-Q3) LLD (cm)** | **% patients with > 1 LP** | **Median (Q1-Q3) HI (days/cm)** | **Median (Q1-Q3) TTT (days)** | **% patients with residual LLD > 2 cm** | **% Procedures with one or more complications** | **% Procedures with one or more complications (HI>45 included)** |
| --- | --- | --- | --- | --- | --- | --- | --- | --- |
| **Unreachable**  **patients** | 67 | 6.0 (4.0 – 7.5) | 4%* | 50 (36 – 64) | 237 (200 – 287) | 10% | 46% | 77% |
| **Patients who filled the PROMs** | 50 | 6.0 (4.0 – 8.0) | 24%* | 49 (42 – 60) | 276 (224 – 380) | 24% | 40% | 67% |
| **Patients reachable and did not fill PROMs** | 61 | 6.0 (4.0 – 10.0) | 16% | 52 (41 – 66) | 253 (205 – 318) | 13% | 42% | 78% |
|  | | *p = 0.193* | *p = 0.009** | *p = 0.795* | *p = 0.051* | *p = 0.171* | *p = 0.484* | *p = 0.198* |
